# Supplementary material for: Pilot study of a multi-pronged intervention using social norms and priming to improve adherence to antiretroviral therapy and retention in care among adults living with HIV in Tanzania
Source: PLoS One. 2017 May 9;12(5):e0177394. doi: 10.1371/journal.pone.0177394 (PMC5423659; doi:10.1371/journal.pone.0177394)
Supplement: S1 Data — (CSV) [file pone.0177394.s001.csv]

Variable	Title	Definition
sid	Unique ID
site	Clinic
treatment	Treatment	Attended during the first two-week intervention period (Intervention) or during the first two-week non-intervention period (Comparison)
exposed	Exposed to the intervention during >=50% of visits	Attended >=50% of visits during intervention weeks
age4cat	Age
sex	Sex
timeart4cat	Time on ART at baseline	Days between ART start date and baseline visit date
initiate	ART initiate at baseline	Started ART <=90 days before baseline
appt_pre	Pre-intervention appointment attendance	% of scheduled visits attended, including the baseline visit and two prior visits
regimen	Treatment regimen at baseline
ret_6mo	Retained in care at 6 months	Attended a visit 6 months after baseline (+/- 30 days)
mpr95_6mo	Medication Possession Ratio >= 95% at 6 months
mpr_6mo	Medication Possession Ratio at 6 months
appt_6mo	Appointment attendance at 6 months	% of scheduled visits attended during the 6 months after baseline
include	Included in analyses
exclude_reason	Reason for exclusion
wt	Sampling weight
strata	Sampling stata
fpc	Sampling frame
